# Supplementary material
Source: PubMed Central journal article supplement (PMC4458449)
Supplement: NIHMS686732-supplement-1.pdf [file NIHMS686732-supplement-1.pdf]

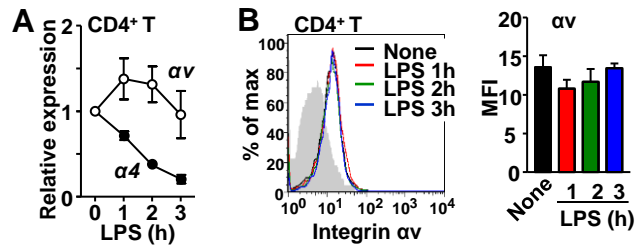

**Figure S1. Expression level of Integrin  $\alpha v$  and integrin  $\alpha 4$  on T cells**  
**(A)** Levels of *Itgav* and *Itga4* mRNA were evaluated in splenic CD4<sup>+</sup> T cells at indicated timepoints after LPS *i.p.* injection. **(B)** Integrin  $\alpha v$  expression levels, determined by flow cytometer, on the splenic T cell surface at indicated timepoints after LPS *i.p.* injection.

**Table S1. Primer lists.**

|              |                                                              |
|--------------|--------------------------------------------------------------|
| <i>Spp1</i>  | F : GCCTGTTTGGCATTGCCTCCTC<br>R : CACAGCATTCTGTGGCGCAAGG     |
| <i>Itgav</i> | F : CTCATCGTTTCTATCCCGCC<br>R : TTGAGTTCCAGCCTTCATCG         |
| <i>Itga4</i> | F : AGGGTCCTTGTCGGAAGTGACAAA<br>R : AGATTCCATCGACTCGGCCATTGT |
| <i>Actb</i>  | F : TGTTACCAACTGGGACGACA<br>R : CTGGGTCATCTTTTCACGGT         |

Sequences of forward (F) and reverses (R) primer are shown from the 5'-end to the 3'-end.
